# Supplementary material for: Using Support Vector Machine and Evolutionary Profiles to Predict Antifreeze Protein Sequences
Source: Int J Mol Sci. 2012 Feb 17;13(2):2196–207. doi: 10.3390/ijms13022196 (PMC3292016; doi:10.3390/ijms13022196)
Supplement: Supplementary file 1 [file ijms-13-02196-s001.pdf]

## Supplementary Information

**Table S1.** The physicochemical properties of the amino acids.

| Order | Physicochemical Property | Range of Property |
|-------|--------------------------|-------------------|
| 1     | Hydrophobicity           | [−2.53, 1.38]     |
| 2     | Hydrophilicity           | [−3.4, 3]         |
| 3     | Side-chain mass          | [1, 130]          |

© 2012 by the authors; licensee MDPI, Basel, Switzerland. This article is an open access article distributed under the terms and conditions of the Creative Commons Attribution license (<http://creativecommons.org/licenses/by/3.0/>).
